# Supplementary material
Source: PubMed Central journal article supplement (PMC4151334)
Supplement: bi500758u_si_001.pdf [file bi500758u_si_001.pdf]

## Supplementary Table and Supplementary Figures

“Converting a Binding Protein into a Biosensing Conformational Switch Using Protein Fragment Exchange (FREX)” by Huimei Zheng, Jing Bi, Mira Krendel, and Stewart N. Loh

**Table S1.** Stability parameters of FN3 mutants.

**Figure S1.** Simulations of Eqs. 1-3 in the text.

**Figure S2.** Guanidine hydrochloride-induced denaturation of FN3 variants monitored by Trp fluorescence.

**Figure S3.** Size exclusion chromatograms of WT FN3-HA4 and the GSSV → YGGG mutant used in the present study.

**Figure S4.** Size exclusion chromatograms of (FN3<sup>BN</sup>+P48+SH2) and (FN3<sup>BN+I75V</sup>+P48+SH2).

**Figure S5.** Unprocessed fluorescence spectra of FN3<sup>BN+I75A</sup> (labeled with donor at the N-terminus) plus acceptor-labeled P60.

**Figure S6.** Switching kinetics monitored by FRET.

**Figure S7.** Images of Cos7 cells transfected with EGFP-FN3<sup>BN+I75A</sup>, mCherry-P48, and SH2.

**Table S1.** Stability parameters of FN3 variants (pH 7.0, 20 °C) obtained by fitting denaturation data to the equation  $\Delta G = \Delta G^{\text{H}_2\text{O}} - m[\text{GdnHCl}]$ .  $C_m$  is the midpoint of denaturation. Errors are standard deviations of triplicate experiments.

| FN3 variant            | $\Delta G^{\text{H}_2\text{O}}$ (kcal mol <sup>-1</sup> ) | $m$ (kcal mol <sup>-1</sup> M <sup>-1</sup> ) | $C_m$ (M)  |
|------------------------|-----------------------------------------------------------|-----------------------------------------------|------------|
| FN3 <sup>BN</sup>      | 5.79 ±0.7                                                 | 2.02 ±0.3                                     | 2.78 ±0.04 |
| FN3 <sup>BN+V77A</sup> | 4.18 ±0.5                                                 | 2.29 ±0.6                                     | 1.96 ±0.3  |
| FN3 <sup>BN+V77G</sup> | 4.50 ±0.1                                                 | 2.80 ±0.1                                     | 1.61 ±0.04 |
| FN3 <sup>BN+I75V</sup> | 4.10 ±0.3                                                 | 1.47 ±0.1                                     | 2.77 ±0.01 |
| FN3 <sup>BN+I75A</sup> | 2.25 ±0.1                                                 | 2.05 ±0.1                                     | 1.11 ±0.03 |

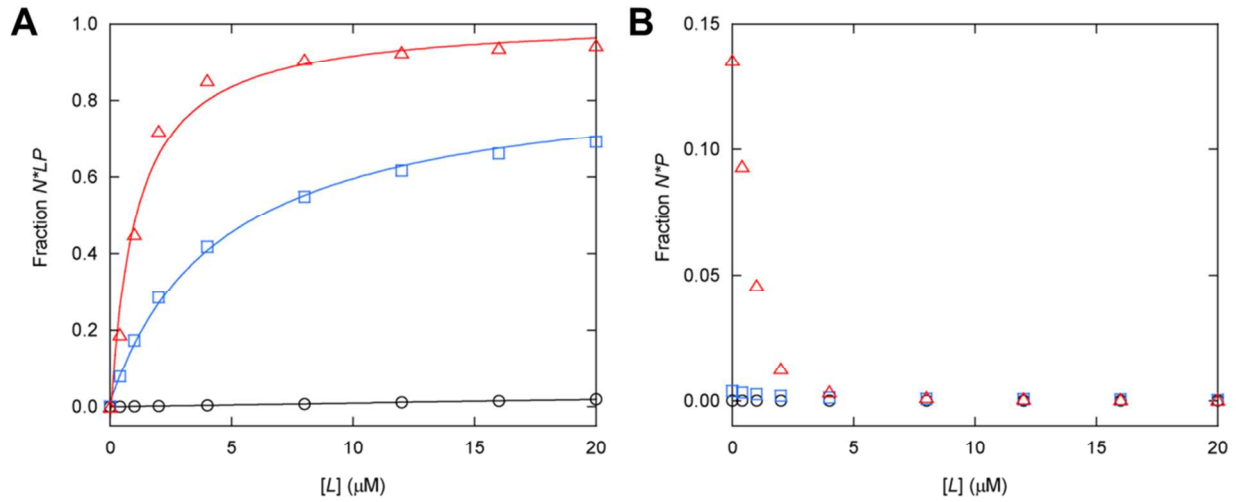

**Figure S1.** Simulations of Eqs. 1-3 (see text) showing fractions of  $N^*LP$  (**A**) and  $N^*P$  (**B**) as a function of ligand concentration. Data sets were generated using  $K_{ex} = 10^5 \text{ M}^{-1}$ ,  $K_a = 10^8 \text{ M}^{-1}$ , and  $K_{unf}$  values of  $5 \times 10^{-5}$  (black circles), 0.02 (blue squares), and 10 (red diamonds).

Concentrations of  $N$  and  $P$  were set to  $2 \text{ } \mu\text{M}$  each. Lines in panel A are best fits of the simulated data to the one-site binding equation; fitted  $K_{a,app}$  values are  $9.7 \times 10^5 \text{ M}^{-1}$  and  $2.2 \times 10^5 \text{ M}^{-1}$  for the red and blue data sets, respectively. Simulations were performed using the Gepasi program [Mendes, P. (1997) *Biochemistry by numbers: simulation of biochemical pathways with Gepasi 3*. *Trends Biochem. Sci.* 22, 361-363].

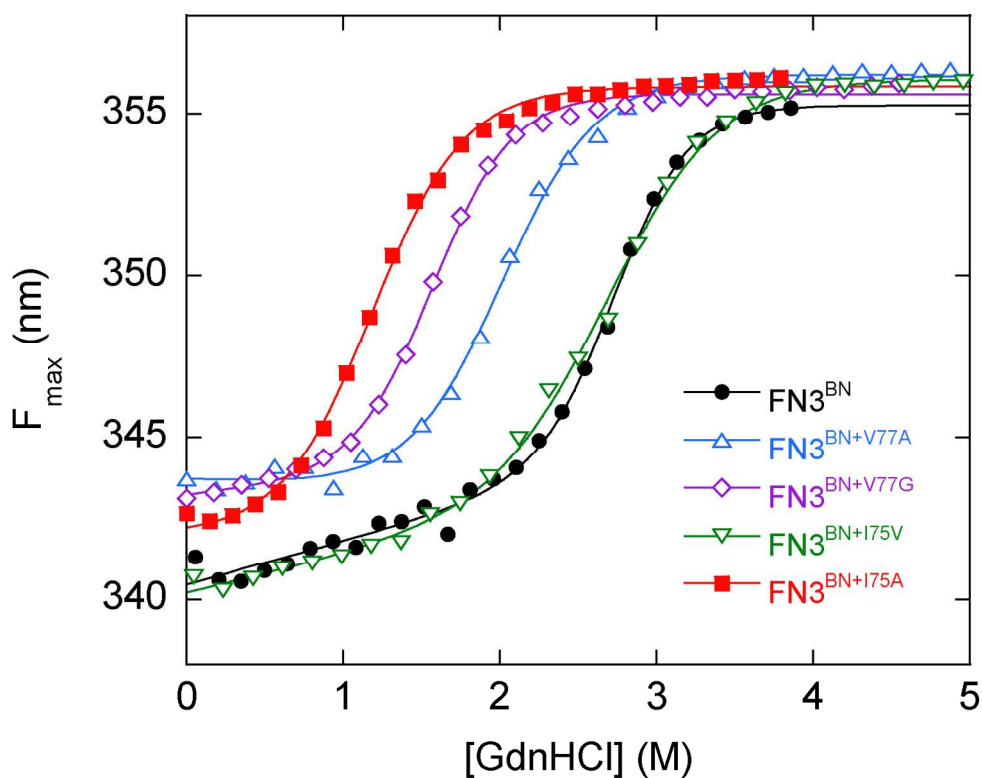

**Figure S2.** Guanidine hydrochloride (GdnHCl)-induced denaturation of FN3 variants monitored by Trp fluorescence. For each emission spectrum (350 – 450 nm), the wavelength of maximum fluorescence ( $F_{\max}$ ) was determined using the peak analysis package of the Igor Pro program (WaveMetrics). These data were then fit to the two-state linear extrapolation equation to generate the lines above. Samples were prepared by mixing a solution of protein (5 – 10  $\mu\text{M}$ ) in 20 mM sodium phosphate (pH 7.0) with an identical solution of protein in the same buffer plus 5 – 7 M GdnHCl, using a Hamilton Microlab 540B dispenser. Samples were equilibrated for 3 h at 20 °C. Data were collected on a Horiba FluoroMax-4 fluorometer with an excitation wavelength of 280 nm. Final denaturant concentrations were determined by index of refraction.

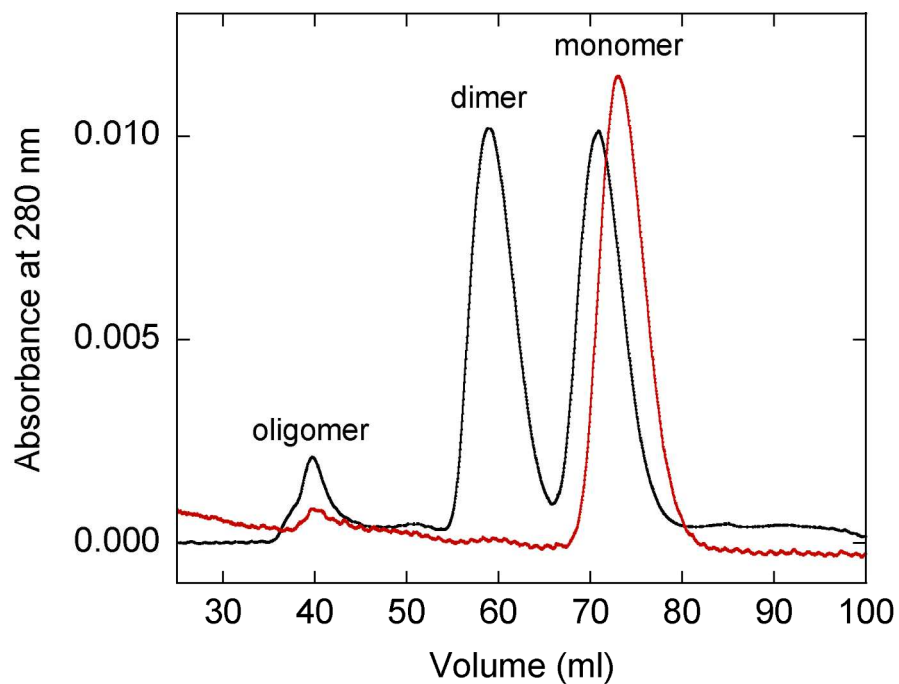

**Figure S3.** Size exclusion chromatograms of WT FN3-HA4 (black) and the GSSV → YGGG mutant used in the present study (red). Protein concentrations are  $\sim 30 \mu\text{M}$ . Data were collected using a Superdex-75 column (GE Healthcare).

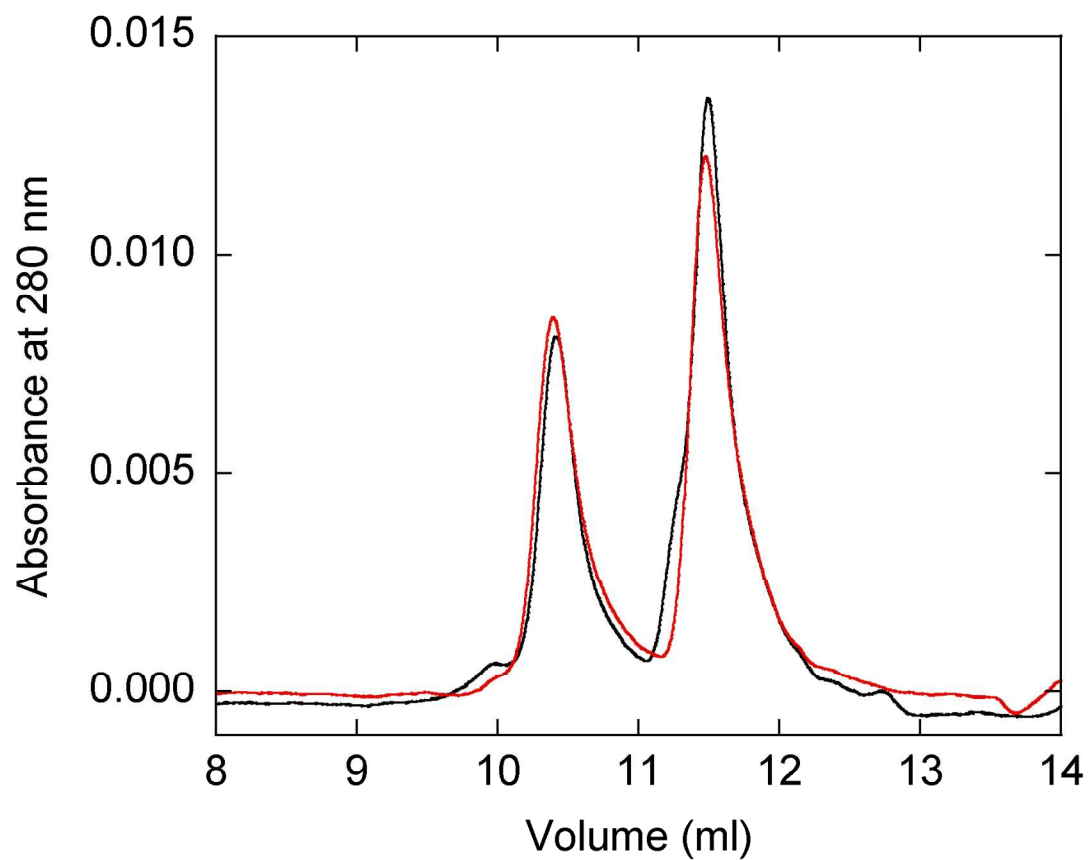

**Figure S4.** Size exclusion chromatograms of (FN3<sup>BN</sup>+P48+SH2) (black) and (FN3<sup>BN+I75V</sup>+P48+SH2) (red). Protein concentrations and experimental conditions are identical to those of Fig. 2 of the text.

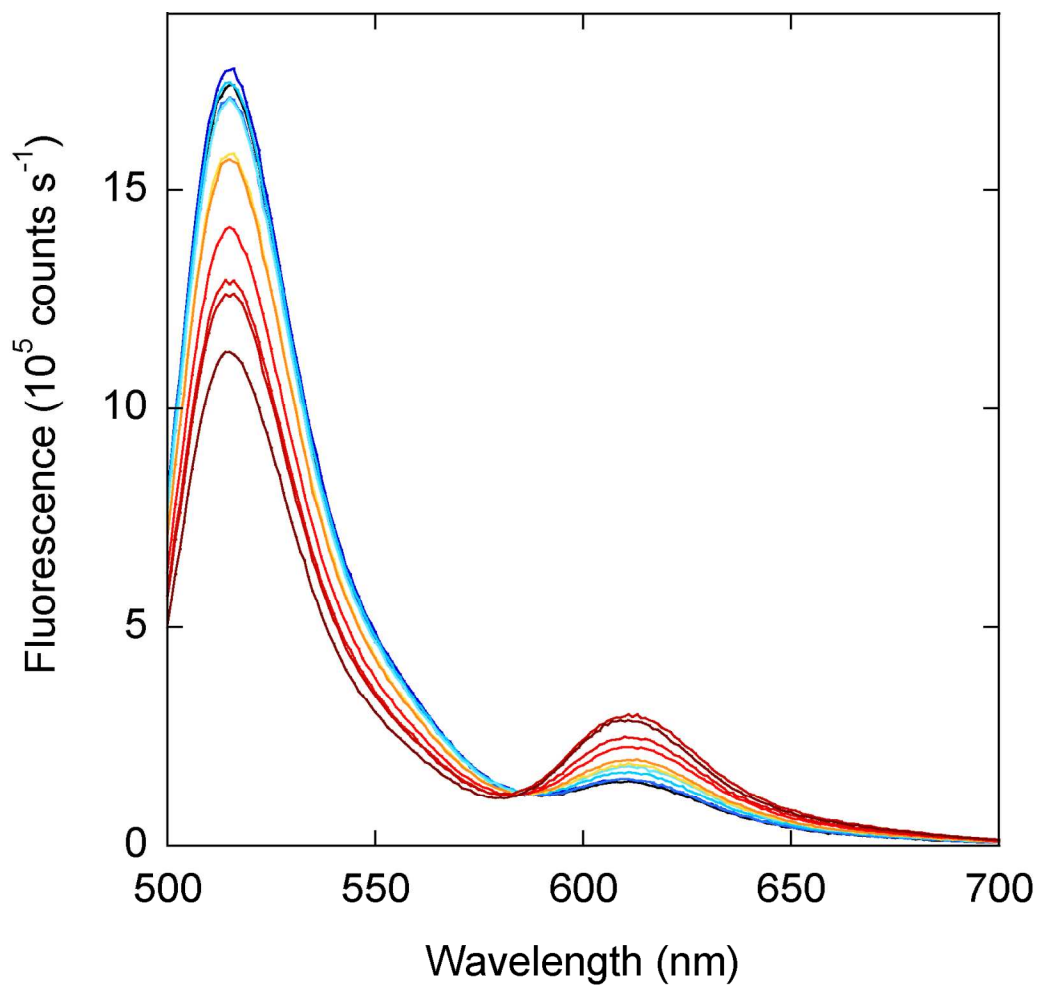

**Figure S5.** Unprocessed fluorescence spectra of FN3<sup>BN+I75A</sup> (labeled with donor at the N-terminus) plus acceptor-labeled P60 are overlaid to show ratiometric changes in fluorescence intensity as a function of increasing SH2 concentration, from zero (black) to 50 μM (dark red) SH2.

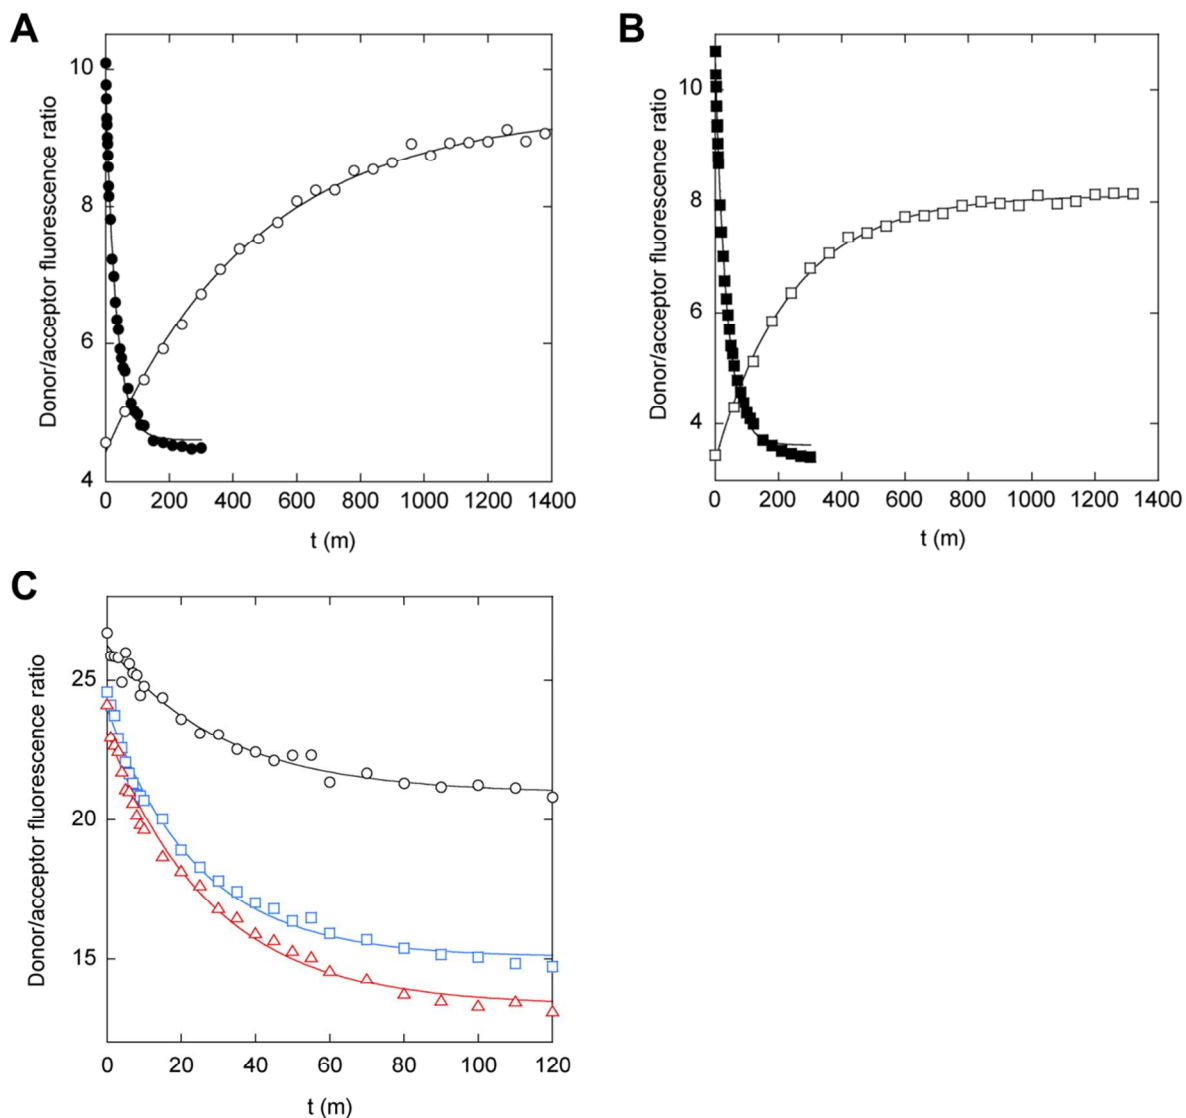

**Figure S6.** Switching kinetics monitored by FRET. **(A)** and **(B)** show on-rates (closed symbols) and off-rates (open symbols) of the P48 and P60 sensors, respectively. FN3<sup>BN+I75A</sup> labeled with Alexa488 at the N-terminus (2  $\mu$ M) was pre-mixed with Alexa495-labeled P48 or P60 (2  $\mu$ M). SH2 (50  $\mu$ M) was then added and fluorescence emission spectra were recorded as described in the text. Dissociation measurements were performed by adding a 10-fold excess of unlabeled FN3<sup>BN+I75A</sup> (20  $\mu$ M) to the above ternary complexes. **(C)** The rate of ternary complex formation



does not depend on SH2 concentration. Experimental conditions are identical to those in panel A except protein concentrations are 0.5  $\mu\text{M}$  FN3<sup>BN+I75A</sup>, 0.5  $\mu\text{M}$  P48, and 10  $\mu\text{M}$  SH2 (black circles), 20  $\mu\text{M}$  SH2 (blue squares), or 40  $\mu\text{M}$  SH2 (red triangles). Lines are best fits of the data to single-exponential functions. Fitted  $k_{\text{on}}$  values are (from lowest to highest SH2 concentration and in units of  $10^{-4} \text{ s}^{-1}$ ): 5.45, 6.84, and 5.86.

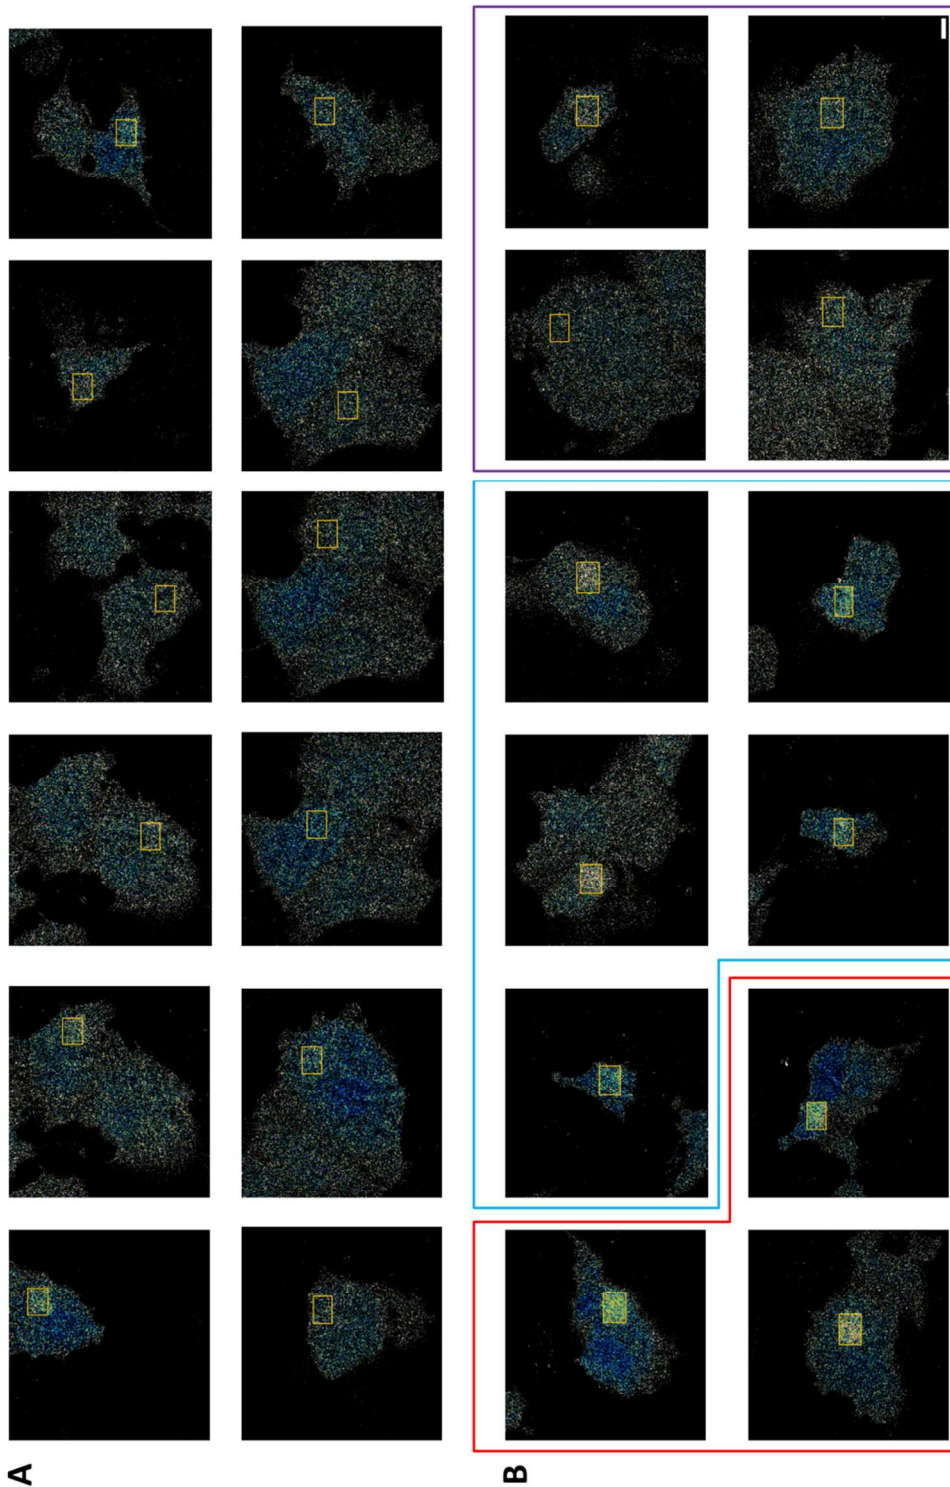

**Figure S7.** FRET images of Cos7 cells transfected with: **(A)** EGFP-FN3<sup>BN+I75A</sup> and mCherry-P48, and **(B)** EGFP-FN3<sup>BN+I75A</sup>, mCherry-P48, and SH2. Boxes indicate areas in the cell that

were photobleached. Colored borders around images in panel B denote cells in which the ratio of FRET efficiency inside versus outside the box is  $>3$  (red),  $2 - 3$  (blue), and  $<2$  (purple).
